# Supplementary material for: Widespread genetic heterogeneity of human ribosomal RNA genes
Source: PubMed Central journal article supplement — RNA. 2022 Apr;28(4):478–92. doi: 10.1261/rna.078925.121 (PMC8925967; doi:10.1261/rna.078925.121), 2022-04

**Supplemental Figure S1.** Population distribution of 38 variants in the rRNA coding region. Violin plots of averaged variant frequencies in 26 populations. Populations are color-coded according to their superpopulations. *Solid lines*, median; *dashed lines*, quartiles. AF, variant allele frequency.

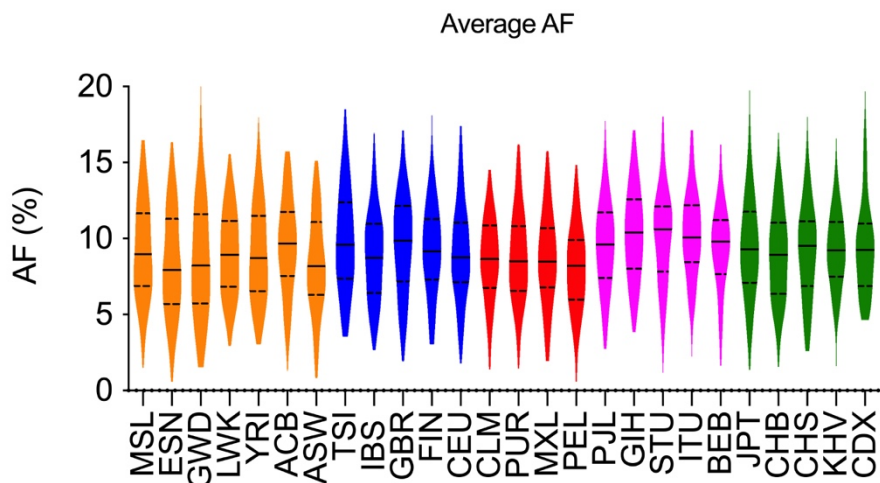

Supplement: supp_078925.121_Supplemental_Fig_S1.pdf [file supp_078925.121_Supplemental_Fig_S1.pdf]
