# Supplementary material for: Widespread genetic heterogeneity of human ribosomal RNA genes
Source: PubMed Central journal article supplement — RNA. 2022 Apr;28(4):478–92. doi: 10.1261/rna.078925.121 (PMC8925967; doi:10.1261/rna.078925.121), 2022-04

**Supplemental Figure S2.** Superpopulation distribution of validated variants. Violin plots of intraindividual variant frequencies arranged according to superpopulations. (A) 5'ETS, (B) ITS2, (C) 28S and (D) 3'ETS rRNA variants. *Solid lines*, median; *dashed lines*, quartiles. AF, variant allele frequency.

**A**

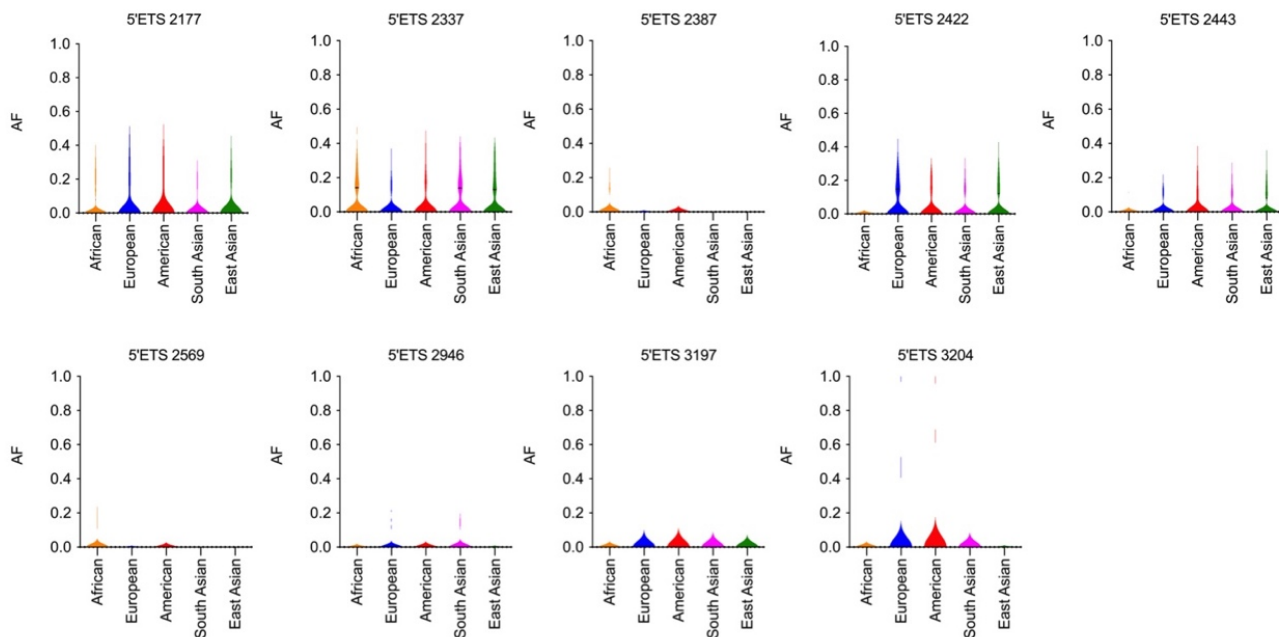

**B**

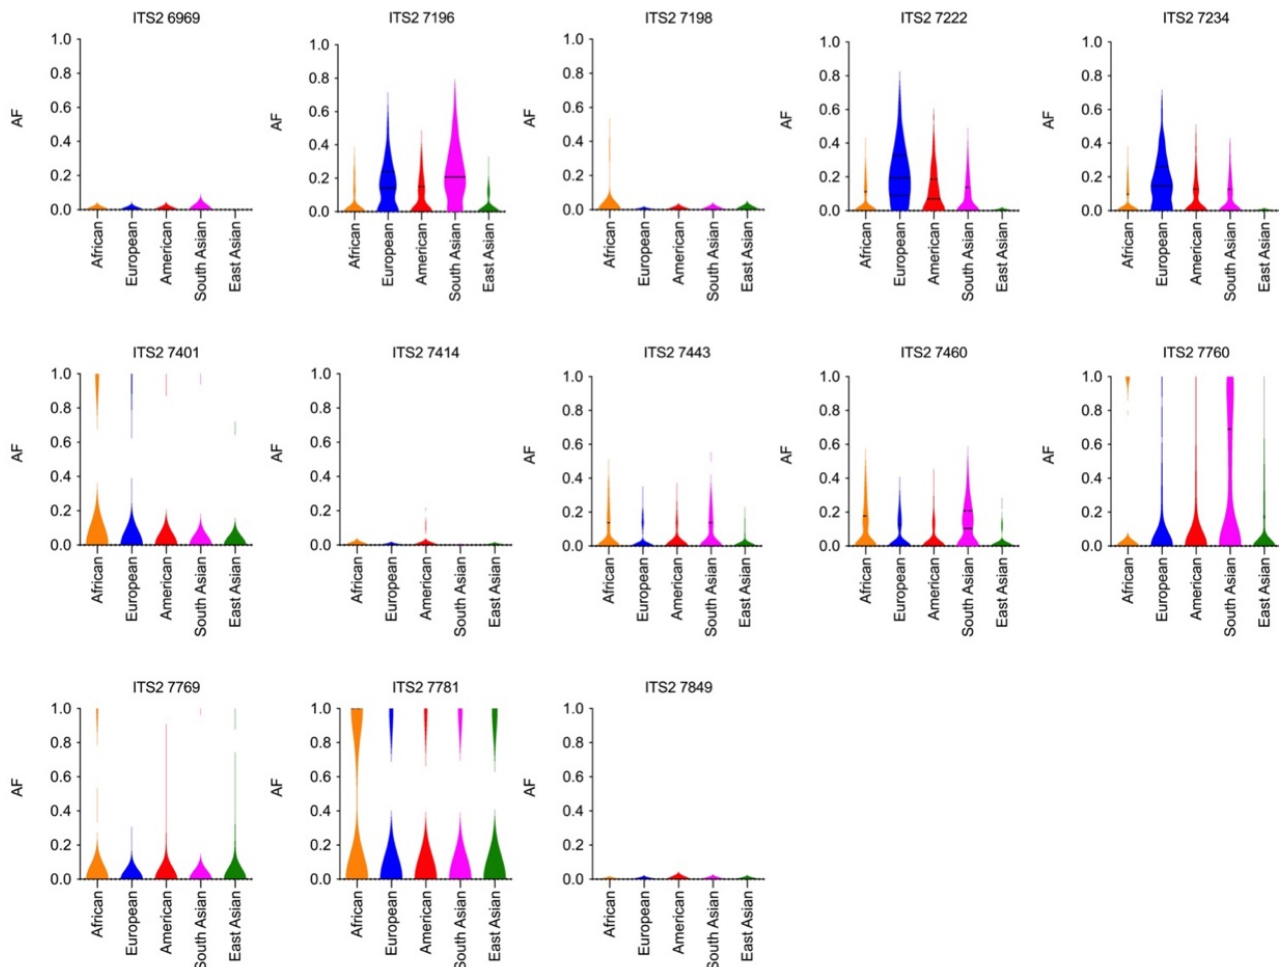

**C**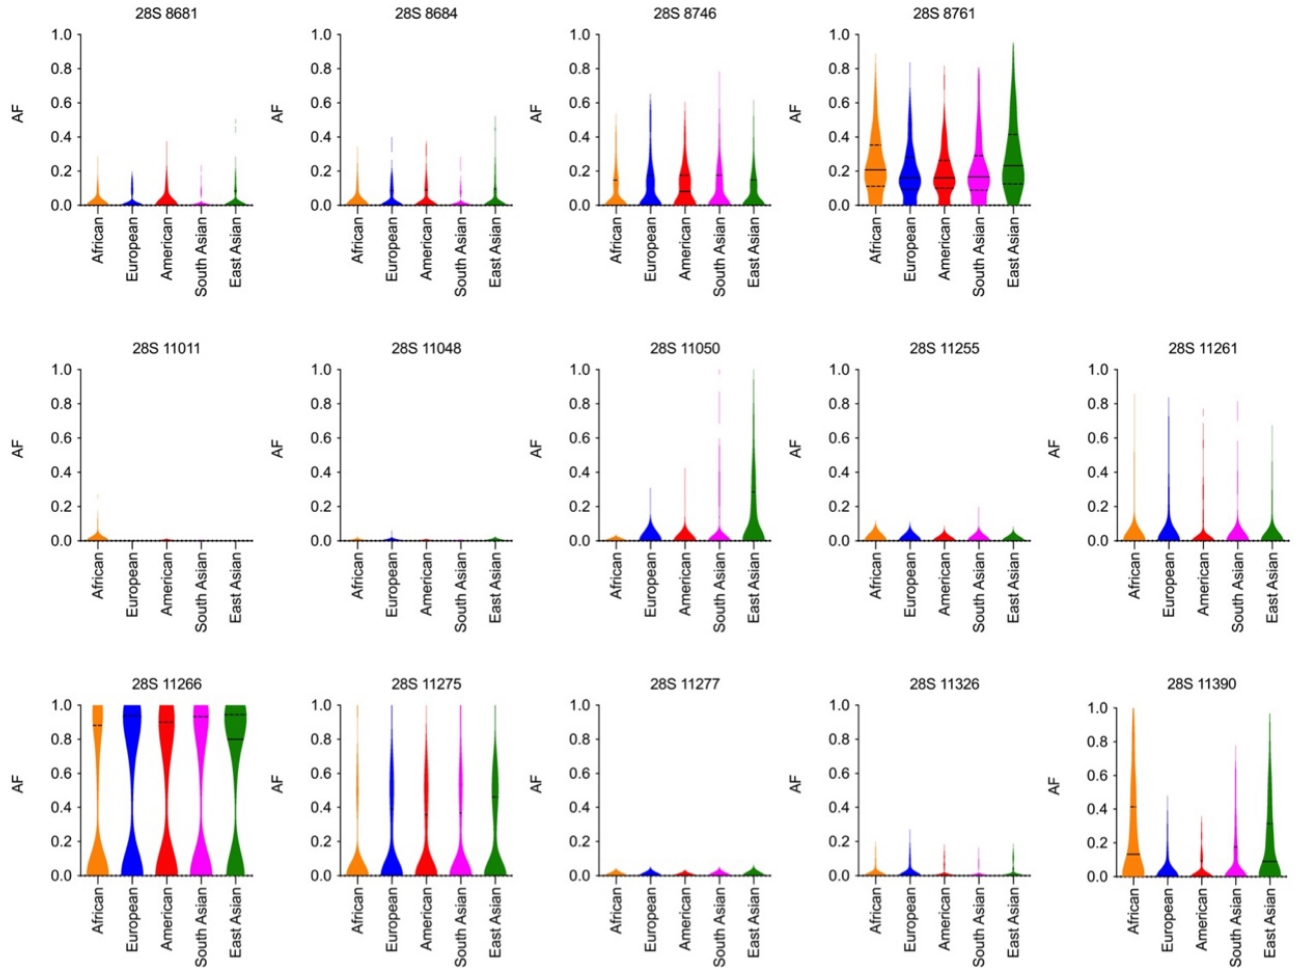**D**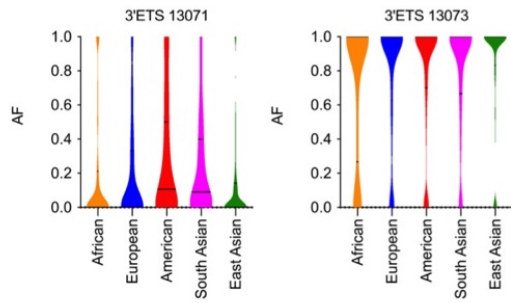

Supplement: supp_078925.121_Supplemental_Fig_S2.pdf [file supp_078925.121_Supplemental_Fig_S2.pdf]
